# Supplementary material for: Automated Interpretation of Clinical Electroencephalograms Using Artificial Intelligence
Source: PubMed Central journal article supplement — JAMA Neurol. 2023 Jun 20;80(8):805–12. doi: 10.1001/jamaneurol.2023.1645 (PMC10282956; doi:10.1001/jamaneurol.2023.1645), 2023-06-20
Supplement: jamaneurol-e231645-s002.pdf [file jamaneurol-e231645-s002.pdf]

## Data Sharing Statement

Tveit. Automated Interpretation of Clinical Electroencephalograms Using Artificial Intelligence. *JAMA Neurol.* Published June 20, 2023. doi:10.1001/jamaneurol.2023.1645

### Data

**Data available:** Yes

**Data types:** Deidentified participant data

**How to access data:** Individual clinical trial participant-level data (IPD) will be shared upon request. For the multi-center test dataset, the anonymized EEG, diagnostic gold standard, demographics (age, gender), output of the algorithm will be available upon request. As the dataset is de-identified, there is no need for consent from the participants. Data will be available upon request, for 10 years from the publication, for scientific non-commercial use.

**When available:** With publication

### Supporting Documents

**Document types:** Statistical/analytic code

**How to access documents:** Python codes - see appendix.

**When available:** With publication

### Additional Information

**Who can access the data:** Data will be available upon request, for 10 years from the publication, for scientific non-commercial use.

**Types of analyses:** Non-commercial.

**Mechanisms of data availability:** After approval of a proposal and with a signed data access agreement.
